# Supplementary material for: National and regional asthma programmes in Europe
Source: PubMed Central journal article supplement — Eur Respir Rev. 2015 Sep;24(137):474–83. doi: 10.1183/16000617.00008114 (PMC9487682; doi:10.1183/16000617.00008114), 2015-09
Supplement: ERR-0081-2014_Moreno-Galdo.pdf [file ERR-0081-2014_Moreno-Galdo.pdf]

To view the full contents of this document, you need a later version of the PDF viewer. You can upgrade to the latest version of Adobe Reader from [www.adobe.com/products/acrobat/readstep2.html](http://www.adobe.com/products/acrobat/readstep2.html)

For further support, go to [www.adobe.com/support/products/acrreader.html](http://www.adobe.com/support/products/acrreader.html)
