# Supplementary material for: National and regional asthma programmes in Europe
Source: PubMed Central journal article supplement — Eur Respir Rev. 2015 Sep;24(137):474–83. doi: 10.1183/16000617.00008114 (PMC9487682; doi:10.1183/16000617.00008114), 2015-09
Supplement: Supplementary_Table_1__180615.pdf [file Supplementary_Table_1__180615.pdf]

**Supplementary table E1. ASTHMA PROGRAMMES in Europe**

| Country                                    | FINLAND                                                                                                                                                                                                                                                                                                                                                                                                                                                                                                                         | FRANCE                                                                                                                                                                                                                                                                                                                                                                                                                                                                                                                                                                                                       | IRELAND                                                                                                                                                                                                                                | ITALY                                                                                                                                                                                                                                                                                                                                                                                                           | The NETHERLANDS                                                                                                                                                                                                                                                                                |
|--------------------------------------------|---------------------------------------------------------------------------------------------------------------------------------------------------------------------------------------------------------------------------------------------------------------------------------------------------------------------------------------------------------------------------------------------------------------------------------------------------------------------------------------------------------------------------------|--------------------------------------------------------------------------------------------------------------------------------------------------------------------------------------------------------------------------------------------------------------------------------------------------------------------------------------------------------------------------------------------------------------------------------------------------------------------------------------------------------------------------------------------------------------------------------------------------------------|----------------------------------------------------------------------------------------------------------------------------------------------------------------------------------------------------------------------------------------|-----------------------------------------------------------------------------------------------------------------------------------------------------------------------------------------------------------------------------------------------------------------------------------------------------------------------------------------------------------------------------------------------------------------|------------------------------------------------------------------------------------------------------------------------------------------------------------------------------------------------------------------------------------------------------------------------------------------------|
| Type of programme                          | National                                                                                                                                                                                                                                                                                                                                                                                                                                                                                                                        | National                                                                                                                                                                                                                                                                                                                                                                                                                                                                                                                                                                                                     | National                                                                                                                                                                                                                               | National                                                                                                                                                                                                                                                                                                                                                                                                        | National                                                                                                                                                                                                                                                                                       |
| Period                                     | 1994-2004                                                                                                                                                                                                                                                                                                                                                                                                                                                                                                                       | 2000-2005                                                                                                                                                                                                                                                                                                                                                                                                                                                                                                                                                                                                    | 2014-2017                                                                                                                                                                                                                              | 2013                                                                                                                                                                                                                                                                                                                                                                                                            | 2014-2018                                                                                                                                                                                                                                                                                      |
| Initiator                                  | The Finnish Ministry of Social Affairs and Health + Working group                                                                                                                                                                                                                                                                                                                                                                                                                                                               | The National Agency for Accreditation and Evaluation of Health (ANAES)                                                                                                                                                                                                                                                                                                                                                                                                                                                                                                                                       | Health Service Executives (HSE)                                                                                                                                                                                                        | GARD Italy                                                                                                                                                                                                                                                                                                                                                                                                      | Lung Alliance Netherlands (LAN)                                                                                                                                                                                                                                                                |
| Executor                                   | Finnish Lung Health organisation (Filha) – a non-governmental org.                                                                                                                                                                                                                                                                                                                                                                                                                                                              |                                                                                                                                                                                                                                                                                                                                                                                                                                                                                                                                                                                                              | Asthma Society of Ireland                                                                                                                                                                                                              | 42 partners                                                                                                                                                                                                                                                                                                                                                                                                     |                                                                                                                                                                                                                                                                                                |
| Population 2012 (million)                  | 5.4                                                                                                                                                                                                                                                                                                                                                                                                                                                                                                                             | 47.5                                                                                                                                                                                                                                                                                                                                                                                                                                                                                                                                                                                                         | 4.6                                                                                                                                                                                                                                    | 60.8                                                                                                                                                                                                                                                                                                                                                                                                            | 16.7                                                                                                                                                                                                                                                                                           |
| Asthma prevalence and other asthma indices | Around 5% (~250 000 patients)<br>~135 000 patients received special drug imbursement<br>Helsinki: 6.5% (1996); 10.0% (2006)                                                                                                                                                                                                                                                                                                                                                                                                     | 4.8<br><br>[Demoly P, et al. Eur Resp Rev 2009;18:105-112]<br><br>]                                                                                                                                                                                                                                                                                                                                                                                                                                                                                                                                          | ~10% (470 000 patients)<br>~20% in children; 40% increase in the prevalence in 13 to 14 years old children in the last 20 years<br>1 death/week due to asthma<br>20 000 Emergency Dept visits,<br>>11 000 bed days due to acute asthma | 6.6 %<br>[de Marco R, et al. Eur Respir J 2012;39:883-892]                                                                                                                                                                                                                                                                                                                                                      | 1. ~4.0% [Van Schayck CP, Smit HA. Eur Respir J 2005;26:647-650]<br><br>370 000 adults<br>150 000 children                                                                                                                                                                                     |
| Goals                                      | As many patients as possible with early asthma should recover<br><br>Asthma patients should feel well, and their ability for work and their functional capacity should correspond to their age<br><br>The percentage of patients with moderate or severe asthma should fall from current 40% to 20%<br><br>The number of bed-days for asthma should decrease by 50% by the year 2000, that is to 50 000 per year<br><br>The annual costs per patients should fall by 50% as a result of more effective prevention and treatment | Development of information on asthma for asthmatics and for the general public, together with the introduction of advisers regarding the domestic environment;<br><br>Improvement of the quality of asthma care with regard to the treatment of severe acute asthma, follow-up of chronic asthma patients and detection of new cases with management of asthmatic children in the school environment;<br><br>Development of therapeutic education;<br><br>Improvement of the management and detection of occupational asthma;<br><br>Establishment of a system to collect information on all epidemiological | 90% reduction of asthma deaths over 10 years<br><br>50% reduction in hospital days<br><br>30% reduction in cost per patient                                                                                                            | Education on asthma and allergy in childhood with the main objective to create documents on the following:<br>- Epidemiology; definition by age, therapy, emergency management<br>- Rehabilitation and physical activities/sports<br>- Therapeutic education<br>- Quality of life<br>- Critical issues in management; the views of professionals and families<br>- Proposal for improving therapeutic adherence | <i>Asthma and COPD:</i><br>25% reduction in hospital days<br><br>15% reduction in lost working days<br><br>20% increase in efficiency of inhalation therapy (QoL per euro)<br><br>25% reduction in number of children <18 years starting to smoke<br><br>10% reduction in deaths due to asthma |

|                     |                                                                                                                                                                                                                                                                                                                                                                                                                                                                                                                                                                                                             |                                                                   |                                                                                                                                                                                                                                  |         |         |
|---------------------|-------------------------------------------------------------------------------------------------------------------------------------------------------------------------------------------------------------------------------------------------------------------------------------------------------------------------------------------------------------------------------------------------------------------------------------------------------------------------------------------------------------------------------------------------------------------------------------------------------------|-------------------------------------------------------------------|----------------------------------------------------------------------------------------------------------------------------------------------------------------------------------------------------------------------------------|---------|---------|
|                     |                                                                                                                                                                                                                                                                                                                                                                                                                                                                                                                                                                                                             | and economic aspects of asthma, and to identify the risk factors. |                                                                                                                                                                                                                                  |         |         |
| Implementation      | <p><i>Stepwise educational sessions:</i><br/> Pulmonary and paediatric hospital units: 100 sessions; 5300 participants<br/> Primary and secondary care professionals: 237 sessions; 3700 participants<br/> All health care professionals: 450 sessions; 25 500 participants</p>                                                                                                                                                                                                                                                                                                                             |                                                                   | <p>Modest investments</p> <p>Commitment to implementation</p> <p>Collaborative approach</p> <p>At start inclusion of 25 000 patients with the most severe asthma</p> <p>Rest of the asthma patients to be included 2015-2017</p> |         |         |
| Programme expansion | <p>1997 The Association of Finnish Pharmacies created a network of 695 asthma pharmacists at local pharmacies</p> <p>2002 Launch of Childhood Asthma miniprogramme: Regional paediatricians and primary care physicians: 25 sessions; 1300 participants</p> <p>2008-2018 National <i>Allergy</i> Programme. Allergy and Asthma Federation conducts a General public awareness -project in cooperation with The Organization for Respiratory Health in Finland (HELI) and the Finnish Central Organization for Skin Patients. Filha is responsible for the professional's education –project (as above).</p> |                                                                   |                                                                                                                                                                                                                                  |         |         |
| References          | [7,8,39,40,52-59]                                                                                                                                                                                                                                                                                                                                                                                                                                                                                                                                                                                           | [9,66]                                                            | [10,11]                                                                                                                                                                                                                          | [12,42] | [13,42] |
