# Supplementary material for: National and regional asthma programmes in Europe
Source: PubMed Central journal article supplement — Eur Respir Rev. 2015 Sep;24(137):474–83. doi: 10.1183/16000617.00008114 (PMC9487682; doi:10.1183/16000617.00008114), 2015-09
Supplement: Supplementary_Table_2_180615.pdf [file Supplementary_Table_2_180615.pdf]

**Supplementary table E2. OUTCOME of the asthma programmes in Europe**

|                                                  | <b>FINLAND</b>                                                                                                                                                                                                                                                                                                                                                                                                                                                                                                                                                                                                                                                                                                                                                                                                                                                                   |                                                                                                                                                                                                                                                                                                                                                                                                                                                                                                                                                                                                                                                                                                                                                                                                                                                                                                                                                                                                                                                                                                                                                                                                                                           |
|--------------------------------------------------|----------------------------------------------------------------------------------------------------------------------------------------------------------------------------------------------------------------------------------------------------------------------------------------------------------------------------------------------------------------------------------------------------------------------------------------------------------------------------------------------------------------------------------------------------------------------------------------------------------------------------------------------------------------------------------------------------------------------------------------------------------------------------------------------------------------------------------------------------------------------------------|-------------------------------------------------------------------------------------------------------------------------------------------------------------------------------------------------------------------------------------------------------------------------------------------------------------------------------------------------------------------------------------------------------------------------------------------------------------------------------------------------------------------------------------------------------------------------------------------------------------------------------------------------------------------------------------------------------------------------------------------------------------------------------------------------------------------------------------------------------------------------------------------------------------------------------------------------------------------------------------------------------------------------------------------------------------------------------------------------------------------------------------------------------------------------------------------------------------------------------------------|
|                                                  | 1993                                                                                                                                                                                                                                                                                                                                                                                                                                                                                                                                                                                                                                                                                                                                                                                                                                                                             | 2004                                                                                                                                                                                                                                                                                                                                                                                                                                                                                                                                                                                                                                                                                                                                                                                                                                                                                                                                                                                                                                                                                                                                                                                                                                      |
| Change in asthma management during the programme | <p><i>Primary care:</i></p> <p>GP</p> <ul style="list-style-type: none"> <li>• Asthma suspicion referred to specialist without lung function tests</li> <li>• Infrequent follow-up visits</li> <li>• Prescriptions renewed without check-up</li> </ul> <p>Nurse</p> <ul style="list-style-type: none"> <li>• Spirometry measurements rarely made or peak flow values followed</li> </ul> <p><i>Specialist care:</i></p> <p>Adults</p> <ul style="list-style-type: none"> <li>• Diagnosis of asthma</li> <li>• Most follow-up visits</li> <li>• Emergency care</li> </ul> <p>Children</p> <ul style="list-style-type: none"> <li>• Diagnoses, treatment, follow-up of all cases</li> <li>• In-patient treatment of acute asthma</li> </ul> <p><i>Pharmacies:</i></p> <p>Asthma coordinators</p> <ul style="list-style-type: none"> <li>• No active role in asthma care</li> </ul> | <ul style="list-style-type: none"> <li>• Diagnosis of asthma</li> <li>• Short specialist consultation as needed</li> <li>• Anti-inflammatory treatment started without delay</li> <li>• Easy access to evidence based guidelines and local treatment chains</li> <li>• Annual follow-up visits</li> </ul> <ul style="list-style-type: none"> <li>• Daily spirometry measurements</li> <li>• Routine guidance in peak flow measurements and use of inhalers</li> <li>• Patient centred asthma education with written action plan</li> <li>• Annual follow-up visits</li> </ul> <ul style="list-style-type: none"> <li>• Only a portion of new diagnoses</li> </ul> <ul style="list-style-type: none"> <li>• Follow-up of severe cases</li> <li>• Part of emergency care</li> </ul> <ul style="list-style-type: none"> <li>• Diagnosis of childhood asthma</li> </ul> <ul style="list-style-type: none"> <li>• Treatment, follow-up of pre-school asthma</li> <li>• Inpatient treatment of acute asthma</li> </ul> <ul style="list-style-type: none"> <li>• Active guidance in use of preventer and reliever inhaler and inhaler technique</li> </ul> <ul style="list-style-type: none"> <li>• Networking with local health care</li> </ul> |
| Main results                                     | <ul style="list-style-type: none"> <li>• Increase in number of patients receiving special drug imbursement (75% price reduction). €135 000 → €239 000 (1993-2011)</li> <li>• Increase in use of controller medication</li> <li>• Decrease in hospital days. Reduction 86%. 110 000 days → 15 000 days (1993-2010)</li> <li>• Disability pension - Reduction by 76%</li> </ul> <p>Reduction in asthma related costs €285 million (1993) → €220 million (2010) → €206 million (2011)</p>                                                                                                                                                                                                                                                                                                                                                                                           |                                                                                                                                                                                                                                                                                                                                                                                                                                                                                                                                                                                                                                                                                                                                                                                                                                                                                                                                                                                                                                                                                                                                                                                                                                           |
| References                                       | [7,8,52-59]                                                                                                                                                                                                                                                                                                                                                                                                                                                                                                                                                                                                                                                                                                                                                                                                                                                                      |                                                                                                                                                                                                                                                                                                                                                                                                                                                                                                                                                                                                                                                                                                                                                                                                                                                                                                                                                                                                                                                                                                                                                                                                                                           |
