# Supplementary material for: National and regional asthma programmes in Europe
Source: PubMed Central journal article supplement — Eur Respir Rev. 2015 Sep;24(137):474–83. doi: 10.1183/16000617.00008114 (PMC9487682; doi:10.1183/16000617.00008114), 2015-09
Supplement: Supplementary_table_2_cont_180615.pdf [file Supplementary_table_2_cont_180615.pdf]

Supplementary table E2 cont. **OUTCOME** of the asthma programmes in Europe

|                                                  | <b>POLAND</b>                                                                                                                                                                                                                                                                                                                                                                                                                                                                                                                                                                                                                                                                                                                                                     | <b>PORTUGAL</b>                                                                                                                                                                                                                                                                                                                                   |
|--------------------------------------------------|-------------------------------------------------------------------------------------------------------------------------------------------------------------------------------------------------------------------------------------------------------------------------------------------------------------------------------------------------------------------------------------------------------------------------------------------------------------------------------------------------------------------------------------------------------------------------------------------------------------------------------------------------------------------------------------------------------------------------------------------------------------------|---------------------------------------------------------------------------------------------------------------------------------------------------------------------------------------------------------------------------------------------------------------------------------------------------------------------------------------------------|
| Change in asthma management during the programme | <p><i>Regional (Lodz):</i><br/>2000-2003</p> <ul style="list-style-type: none"> <li>• Self-management education for children and their parents</li> <li>• Increasing knowledge about asthma and its prevention and treatment</li> <li>• Education of classmates to engender support</li> <li>• School fairs and information sessions for children, parents and teachers</li> <li>• Question and answer sessions for teachers and principles</li> <li>• Information provided to the clinician of the child</li> <li>• Promotion of scientific research into asthma</li> </ul> <p><i>After finishing the programme a delay in diagnoses and treatment has been reported [Majak P, et al. J Asthma 2011;48:414-418].</i></p> <p><i>National</i><br/>Not reported</p> |                                                                                                                                                                                                                                                                                                                                                   |
| Main results                                     | <p><i>Regional (Lodz):</i></p> <ul style="list-style-type: none"> <li>• Decrease in hospital days: 1.48/1000 (2000) → 0.86/1000 (2003)</li> <li>• Increase in new cases of asthma: 0.99/1000 (2000) → 2.19/1000 (2003)</li> <li>• Duration of hospitalization (days): 10.9 (1999) → 8.4 (2003)</li> <li>• Establishment of new Asthma Schools for education</li> </ul> <p><i>National</i></p> <ul style="list-style-type: none"> <li>• No results reported</li> </ul>                                                                                                                                                                                                                                                                                             | <ul style="list-style-type: none"> <li>• Reduction of hospitalization rate by 14.9%; mean stay 5.9 days (2000-2007)</li> <li>• Increase in mortality:<br/>0.162/100 000 (2002)<br/>→ 0.324/100 000 (2005)</li> <li>• Mean annual costs €117.5 million (drugs €24.2. outpatient costs €25.0, hospital costs €3.4, work days lost €64.9)</li> </ul> |
| References                                       | [15,16]                                                                                                                                                                                                                                                                                                                                                                                                                                                                                                                                                                                                                                                                                                                                                           | [17]                                                                                                                                                                                                                                                                                                                                              |
